# Supplementary material
Source: PubMed Central journal article supplement (PMC4965852)
Supplement: oc6b00112_si_001.pdf [file oc6b00112_si_001.pdf]

1 **Supporting Information**

2 **Reconstitution and Functional Analysis of a Full-Length**  
3 **Hepatitis C Virus NS5B Polymerase on a Supported Lipid**  
4 **Bilayer**

5 Nam-Joon Cho<sup>1,2,\*#</sup>, Edward Pham<sup>2,3#</sup>, Rachel J. Hagey<sup>3</sup>, Vincent J. L  v  que<sup>4</sup>, Han Ma<sup>4</sup>, Klaus  
6 Klumpp<sup>4</sup>, and Jeffrey S. Glenn<sup>2,3,5,+</sup>

7 <sup>1</sup>Department of Chemical Engineering, Stanford University, Palo Alto, California;

8 <sup>2</sup>Department of Medicine, Division of Gastroenterology and Hepatology, Stanford University  
9 School of Medicine, Palo Alto, California;

10 <sup>3</sup>Department of Microbiology and Immunology, Stanford University School of Medicine, Palo  
11 Alto, California;

12 <sup>4</sup>Virology Discovery, Hoffmann-La Roche Inc., Nutley, New Jersey;

13 <sup>5</sup>Veterans Administration Medical Center, Palo Alto, California

14 \* current address: Nanyang Technological University, Singapore

15 #These authors contributed equally to this work.

16

17

18 + To whom correspondence should be addressed:

19 Dr. Jeffrey S. Glenn, Department of Medicine, Division of Gastroenterology and  
20 Hepatology, Stanford University School of Medicine, Stanford University, CCSR 3115A,  
21 269 Campus Drive, Stanford, CA, 94305-5171; Tel:(650) 725-3373; Fax:(650) 723-  
22 3032; Email: [jeffrey.glenn@stanford.edu](mailto:jeffrey.glenn@stanford.edu)

23

24

25 **Supplementary Materials and Methods.**

26 **Supporting Figure 1. Denaturing Polyacrylamide Gel of Recombinant**  
27 **Proteins Used in this Study.**

28 **Supporting Figure 2. Proposed Model for NS5B-FL in solution.**

29 **Supporting Figure 3. SLB Platform on the Quartz Crystal Microbalance with**  
30 **Dissipation Monitoring (QCM-D) Nanomass Sensor.**

31 **Supporting Figure 4. Membrane Association of Recombinant HCV NS5B-FL and**  
32 **its C-terminal deletion mutants.**

33 **Supporting Figure 5. QCM-D Kinetics of NS5B C-Terminal Peptide Binding to SLB**  
34 **Platform.**

35 **Supporting Figure 6. Full length NS3 alone does not associate with membranes.**

36 **Supporting Figure 7. Full Kinetic Traces for Step-by-Step Assembly and RNA-**  
37 **Dependent RNA Polymerase (RdRp) Activity of the Membrane-Associated**  
38 **HCV Replicase Complex.**

39 **Supporting Figure 8. No polymerase activity is observed when fewer than all four**  
40 **native NTP species are added.**

41 **Supporting Figure 9. NS5A $\Delta$ 32 Directly Binds to NS5B-FL.**

42 **Supporting Figure 10. Northern blot analysis of QCM products.**

43 **Supporting Figure 11. Chemical structures of non-nucleoside HCV NS5B**  
44 **inhibitors HCV-796 and VX-222.**

45 **Supporting Table 1. Summary of Kinetic Values.**

46 **Supporting Table 2. QCM-D Measurement Data of Immobilized NS5B-FL Protein**  
47 **and Enzyme Kinetics.**

48

49

50

51

52

53

54

55

56

57

58

59

60

## 61 **Materials and Methods**

### 62 **Protein purifications**

63 Recombinant full-length HCV NS3 proteins from Con1 or BK strains (NS3-FL-Con1 and  
64 NS3-FL-BK) were expressed in E.coli BL21(DE3) cells. Lysates were prepared by  
65 suspension of cell pellets in NS3-FL disruption buffer (50 mM Tris-HCl pH 7.8, 20%  
66 glycerol, 500 mM NaCl, 0.05% maltopyranoside, 10 mM  $\beta$ -mercaptoethanol (BME), 10  
67 mM imidazole), 10 U/ml benzonase and one complete protease inhibitor tablet (Roche)  
68 per 50 ml disruption buffer. Suspensions were disrupted by micro fluidization at 14K psi  
69 and 120 psi respectively, spun for 30 min at 14, 000 rpm or 18, 000 RCF respectively to  
70 remove debris. Supernatants were filtered using 0.45 micron filters and loaded onto a  
71 Ni-NTA (Qiagen) or immobilized metal affinity chromatography (GE healthcare) columns  
72 respectively. Columns were pre-equilibrated with buffer A (disruption buffer that did not  
73 contain protease inhibitors or nuclease). Columns were washed with buffer A until  
74 baseline was re-established and eluted with a 10 column volumes (CV) gradient 0-  
75 100% buffer A to buffer B (buffer A + 250 mM imidazole, pH 7.8). Gradient peaks were  
76 collected and dialyzed in 4x volume of buffer C (50 mM Tris, pH 7.8 plus 20% glycerol,  
77 0.05% maltopyranoside/ dodecyl maltoside, 2 mM DTT) for 40 h. Dialyzed solutions  
78 were centrifuged and supernatant loaded onto a heparin-sepharose HP column (GE  
79 healthcare) pre-equilibrated in 5-10 CV buffer D (buffer C plus 0.1M NaCl). Columns  
80 were washed with buffer D and protein eluted in 6 CV using a gradient from 0.1 M to 0.4  
81 M NaCl in buffer D. Peak fractions were pooled, NaCl adjusted to a final concentration  
82 of 0.5 M and stored at -80°C.

83 NS3-helicase domain from HCV BK strain was purified from E.coli cell pellets  
84 that were resuspended in lysis buffer (50 mM Tris-HCl, pH 8.0, 500 mM NaCl, 1 mM  
85 DTT, 20 mM imidazole) and protease inhibitor cocktail (Roche Diagnostic) with stirring  
86 for 1 h followed by passage through a micro fluidizer and centrifugation at 186,000×g for  
87 45 min. Supernatant was filtered and loaded onto two tandem 5 mL HisTrap™ HP  
88 columns (GE healthcare) equilibrated with buffer A (lysis buffer without protease  
89 inhibitors). Proteins were eluted with a linear gradient to 1 M imidazole in buffer A, peak  
90 fractions were pooled and further purified by gel filtration on a Superdex 200 26/60  
91 column (GE healthcare), equilibrated in buffer A.

92 NS3 protease domain protein NS3-Protease-BK was prepared from E.coli cell pellets by  
93 lysis in NS3-PD disruption buffer (50mM HEPES, pH 8.0, 0.3M NaCl, 10% Glycerol,  
94 0.1% octyl glucoside, 5 mM BME, 5 mM imidazole), 1X complete EDTA-free protease  
95 inhibitor (Roche) and 10 U/ml benzonase, followed by homogenization, micro fluidization,  
96 centrifugation and filtration as described above for full-length NS3 protein. The filtrate  
97 was run through an IMAC column pre-equilibrated in IMAC buffer A (disruption buffer)  
98 and eluted in 25 column volumes of a gradient of IMAC buffer B (buffer A + 300 mM  
99 imidazole) from 0-100%. Peak fractions were pooled and concentrated to 2 ml and then  
100 loaded onto a superdex 75 column equilibrated in buffer A. Peak fractions were pooled,  
101 concentrated to ~1-2 mg/ml using an Amicon ultra centrifugal filtration device (10 kDa  
102 MWCO).

103 NS5A protein HCV His6-NS5A BK (33-447) was purified from E.coli cell pellets that  
104 were resuspended in NS5A lysis buffer (50 mM Tris-HCl, pH 8.0, 500 mM NaCl, 1 mM

105 DTT, 20 mM imidazole) and protease inhibitor cocktail (Roche Diagnostic) with stirring  
106 for 1 h followed by passage through a micro fluidizer and centrifugation at 186,000×g for  
107 45 min. The supernatant was filtered and loaded onto three tandem 5 mL HiTrap™  
108 heparin columns also equilibrated with lysis buffer. Protein was eluted using a linear  
109 gradient of 50 mM to 1 M NaCl. This chromatography was repeated to optimize protein  
110 purity to homogeneity. The protein was dialyzed with storage buffer (50mM Tris-HCl,  
111 pH 8.0, 150 mM NaCl, 5 mM DTT, 10% glycerol).

112 NS5A N-terminal domain was purified from E.coli cell pellets that were resuspended in  
113 NS5A lysis buffer (25 mM Tris, pH 8.0, 50 mM NaCl, 10 % glycerol, 0.1 % igepal CA-  
114 630 (Sigma), 20 mM imidazole, 1 X complete EDTA-free protease inhibitors (Roche)  
115 and 10 U/ml benzonase) with stirring for 1 h followed by passage through a micro  
116 fluidizer and filtration using 0.45 micron filters. The filtrate was run through a Ni-NTA  
117 column pre-equilibrated with buffer A (25 mM Tris-HCL, pH 8.0, 400 mM NaCl, 10 %  
118 glycerol, 0.1 % igepal CA-630 (Sigma) and 20 mM imidazole), and eluted with 0-100%  
119 gradient of buffer A to buffer B (buffer A + 200 mM imidazole). Peak fractions were  
120 desalted by gel filtration and further purified using a resource Q column pre-equilibrated  
121 with buffer A2 (25 mM Tris-HCL, pH 8.0, 50 mM NaCl and 10% glycerol) and eluted with  
122 buffer B2 (A2 + 1 M NaCl). Peak fractions were concentrated to ~ 2.5 ml and loaded  
123 onto an SEC column pre-equilibrated with SEC buffer (25 mM HEPES, pH 8.0, 250 mM  
124 NaCl and 10% glycerol). Peak fraction were pooled and concentrated before storage.

125

126 **Generation of RdRp template and assay conditions in solution**

127 A 377 nucleotide RNA template (the 3' terminus of the viral negative strand RNA,  
128 termed "cIRES") was generated as described in Klumpp et al (*J Biol Chem* 281(7):3793-  
129 3799). Briefly, 377 nucleotides cIRES RNA, from the 3'-end of HCV (-)-strand RNA,  
130 was synthesized in vitro using a T7 RNA polymerase transcription kit (Ambion, Inc.) and  
131 purified either by phenol-chloroform extraction or using the Qiagen RNeasy maxi kit,  
132 with similar results. In vitro HCV polymerase reactions contained 10 µg/ml cIRES RNA  
133 template, 50 nM polymerase protein, 1 µM tritiated UTP or CTP (1–5 µCi), 1 µM ATP, 1  
134 µM CTP, 1 µM GTP, 40 mM Tris-HCl pH 8.0, 4 mM dithiothreitol, and 4 mM MgCl<sub>2</sub> and  
135 were performed as described in Klumpp et al (*J Biol Chem* 281(7):3793-3799).

136

### 137 **SLB experiments**

138 For supported lipid bilayer experiments, lipid bilayers were formed on the solid support  
139 using 10 mM Tris buffer [pH 7.5] with 150 mM NaCl. After bilayer formation, a buffer-  
140 exchange was performed and 40 mM Tris-HCl buffer [pH 8.0] with 50 mM NaCl, 4 mM  
141 MgCl<sub>2</sub> and 4 mM DTT ("reaction buffer") was introduced and used as the buffer for all  
142 protein binding and activity measurements. Proteins and cIRES RNA template were  
143 introduced into the QCM chamber at a final concentration of 87 µg/ml and 50 µg/ml,  
144 respectively. Protein and nucleotide dilutions were carried out in reaction buffer and the  
145 final nucleotide concentrations for the replicase measurements were 500 µM per  
146 nucleotide (ATP, UTP, GTP and CTP). For inhibition studies involving inhibitor, 500 µM  
147 of inhibitor was added together with 500 µM of each nucleotide (ATP, UTP, GTP and  
148 CTP).

149 **Supporting Figure 1. Denaturing Polyacrylamide Gel of Recombinant Proteins**  
150 **Used in this Study.** One microgram of each protein was loaded onto a 4-12% Bis-Tris  
151 gel and run at 150V for 80 minutes. Gel was stained using SimplyBlue Safe Stain (Life  
152 Technologies). Loading was as follows: (L) BenchMark™ ladder, (1) NS5B-FL, (2)  
153 NS5B- $\Delta$ 21, (3) NS5A- $\Delta$ 32, (4) NS3-FL, (5) NS3 Protease domain, (6) NS3 Helicase  
154 domain.

155

156

157

158

159

160

161

162

163

164

165

166

167

168

169

170

171

172

173

174

175

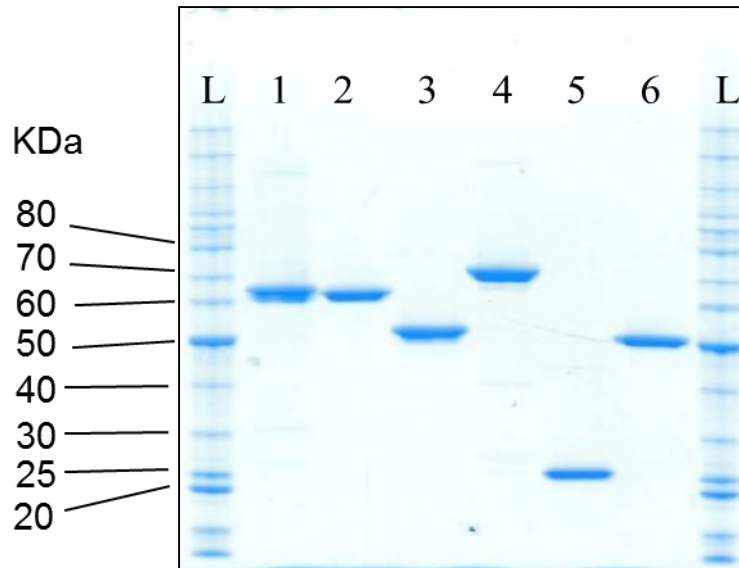



176 **Supporting Figure 2. Schematic models of NS5B-FL protein in solution and**  
177 **associated with bilayer membrane.**

178 The models are based on the NS5b- $\Delta$ 21 crystal structure 1C2P.<sup>1</sup> **A**, NS5b- $\Delta$ 21 crystal  
179 structure with the active site residues colored in red. **B**, model of the membrane-bound  
180 NS5B-FL protein. The model of the 28-mer C-terminal sequence that is missing in the  
181 1C2P crystal structure was constructed via Pymol (Schrödinger LLC), as an extension  
182 from Ser-563 (564-LSRARPRWFM LCLLLLSVGV GIYLLPNR, transmembrane domain  
183 underlined and in agreement with TMHMM ((<http://www.cbs.dtu.dk/services/TMHMM/>)).  
184 Using an overall extended conformation, the resulting structure was energy-minimized  
185 using BABEL (<http://www.ncbi.nlm.nih.gov/pubmed/?term=21982300>). The C-terminal  
186 end of NS5B-FL is of sufficient length and has appropriate properties to form a  
187 transmembrane domain (colored in yellow), and to bring the polymerase protein into  
188 close contact with the membrane. **C**, model of NS5B-FL in solution. In solution, the C-  
189 terminal domain (colored in yellow) may fold back into the active site and act as a  
190 polymerase inhibitory domain. The model was built using Pymol, taking into account  
191 hydrophobic and electrostatic interactions, H-bonding and secondary structure  
192 constraints. The C-terminus was modeled as a helix-turn-helix, with a helical propensity  
193 towards  $3_{10}$  helices. It has sufficient length to reach and block the opening to the active  
194 site, while the hydrophobic residues in the transmembrane domain have reduced  
195 solvent exposure. Energy minimizations, but no large-scale molecular dynamics  
196 simulations were performed.

197

198

**A**

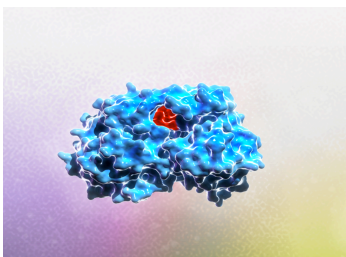

**B**

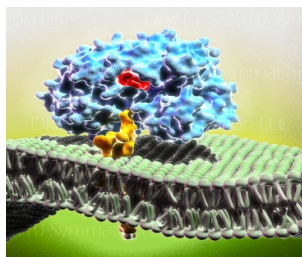

**C**

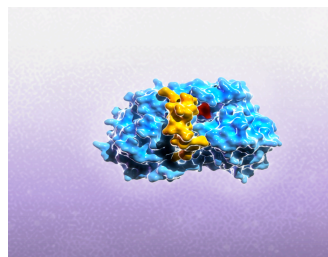

199

200

201

202

203 **Supporting Figure 3. SLB Platform on the Quartz Crystal Microbalance with**  
204 **Dissipation Monitoring (QCM-D) Nanomass Sensor.**

205 **A) Overview of the QCM-D measurement principle.** The QCM-D technique permits  
206 real-time monitoring of mass adsorption onto a quartz crystal substrate <sup>2</sup>. The  
207 piezoelectric quartz crystal is positioned between two electrodes, and oscillates when  
208 an AC voltage is applied across it. When additional mass (e.g., lipid vesicles) adsorbs  
209 onto the substrate, the crystal's resonance frequency of oscillation decreases. The  
210 frequency change,  $\Delta f$ , is proportional to the mass of the adsorbed material. To describe  
211 the adsorbed material's viscoelastic properties, the circuit can be opened, permitting the  
212 crystal's oscillation to decay exponentially. The energy loss per stored energy during  
213 one oscillation cycle is referred to as the energy dissipation,  $D$ , which is proportional to  
214  $1/\tau$ , where  $\tau$  is the decay time constant. Films with large viscous loss will display larger  
215  $\Delta D$  than more rigid films because the ratio between energy loss and stored energy will  
216 be larger. **B) Intact vesicle platform.** On surfaces that include titanium oxide and gold,  
217 lipid vesicles adsorb but do not rupture due to insufficient adhesion energy. The result is  
218 a full monolayer of adsorbed, unruptured vesicles. **C) Supported lipid bilayer (SLB)**  
219 **platform.** On a silicon oxide surface, the adhesion energy can be sufficient to result in  
220 the rupture of lipid vesicles and thus a spontaneous formation of a lipid bilayer from  
221 vesicles (SLB platform self-assembly). **D) QCM-D kinetic trace for SLB platform self-**  
222 **assembly.** The characteristic SLB formation signature is a two-step kinetic process.  
223 Lipid vesicles first adsorb and remain intact on silicon oxide, resulting in a decrease in  
224 frequency ( $\Delta f$ ), consistent with addition of mass to the surface and an increase in  
225 dissipation ( $\Delta D$ ). After reaching a critical surface coverage of lipid vesicles, the  
226 combination of vesicle-vesicle and vesicle-substrate interactions promotes the rupture  
227 of lipid vesicles and the formation of a lipid bilayer. This lipid bilayer assembly process  
228 is characterized by an increase in  $\Delta f$  to  $\sim 24$  Hz (consistent with the loss of mass as  
229 compared to the vesicle surface) and a decrease in  $\Delta D$ . Note that the critical surface  
230 coverage necessary for vesicle rupture and SLB formation depends on a number of  
231 experimental parameters, including vesicle size, lipid composition, ionic strength,  
232 osmotic pressure, pH, and temperature.<sup>2-7</sup> As such, the  $\Delta f$  and  $\Delta D$  values corresponding  
233 to the critical surface coverage can vary. Further, in cases where there are very strong  
234 vesicle-surface interactions, vesicle rupture and SLB formation can be accelerated and  
235 proceed through apparent one-step kinetics.

236

237

(A)

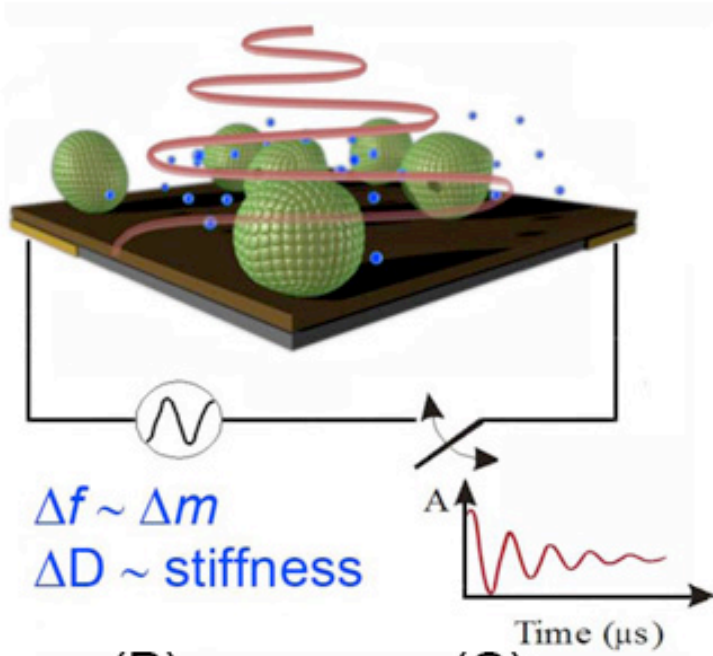

(B)

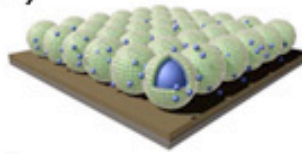

(C)

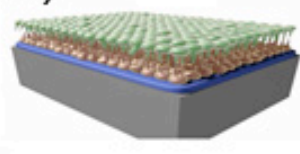

(D)

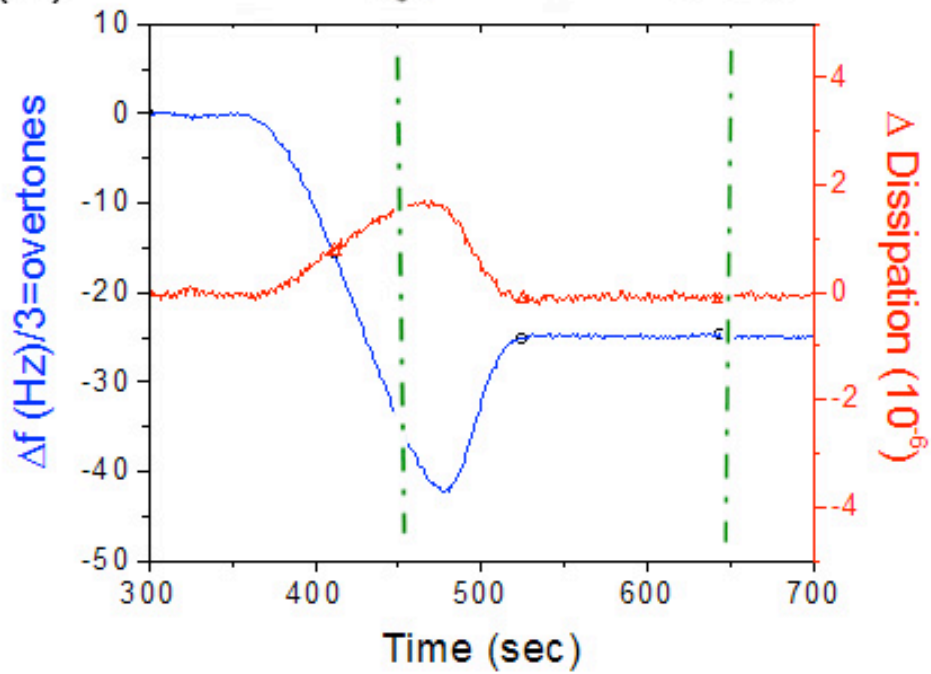

238

239

240 **Supporting Figure 4. Membrane Association of**  
241 **Recombinant HCV NS5B-FL and its C-terminal**  
242 **deletion mutants. A)** Membrane association of  
243 NS5B-FL-c-His protein (this full length NS5b protein  
244 carries an additional His-tag label on the C-  
245 terminus). The protein is added at the 30min time  
246 point (arrow), resulting in a large increase in  
247 dissipation (red curve) and a reduction in frequency  
248 (blue curve), consistent with the addition of protein  
249 mass to the bilayer membrane. **B)** Addition (arrow)  
250 of the truncated protein lacking the C-terminal 21  
251 amino acids, but carrying a N-terminal His-tag  
252 (NS5B $\Delta$ 21-n-His), or **C)** addition (arrow) of the  
253 truncated protein lacking the C-terminal 21 amino  
254 acids, but carrying a C-terminal His-tag, (NS5B $\Delta$ 21-  
255 c-His) did not lead to changes in frequency,  
256 consistent with the lack of membrane binding of the  
257 truncated NS5b proteins.

258  
259  
260  
261  
262  
263  
264  
265  
266  
267  
268  
269  
270  
271

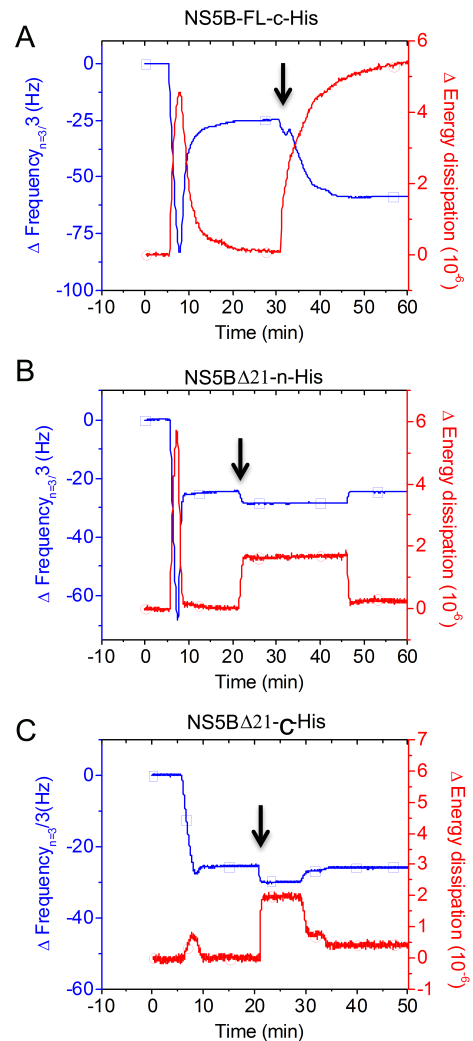

272 **Supporting Figure 5. QCM-D Kinetics of NS5B C-Terminal Peptide Binding to the**  
 273 **immobilized lipid bilayer.** The interaction of a 21 amino acid long peptide  
 274 corresponding to the NS5B C-terminus with the SLB platform was investigated by QCM-  
 275 D monitoring of resonance frequency (red) and energy dissipation (blue). **A)** At 6  $\mu\text{M}$   
 276 NS5B C-terminal peptide concentration, peptide binding to the lipid bilayer indicated by a  
 277 reduction in frequency (blue). The kinetic behavior suggested membrane penetration,  
 278 as indicated by the kink in signal response (highlighted by circles) that is indicative of  
 279 peptide rearrangement at the membrane interface, an initial increase in mass from the  
 280 addition of peptide, followed by a loss of mass from the displacement of lipid from the  
 281 surface. The compensatory loss of mass after peptide addition differentiates membrane  
 282 penetration through the lipid bilayer from simple adhesive peptide binding to the bilayer  
 283 surface. **B)** At 12  $\mu\text{M}$  NS5B C-terminal peptide concentration, the initial frequency  
 284 change was doubled (consistent with the addition of double mass). Together, the QCM-  
 285 D responses demonstrate that the NS5b C-terminal peptide shows concentration-  
 286 dependent binding kinetics indicative of membrane penetration.<sup>8</sup>

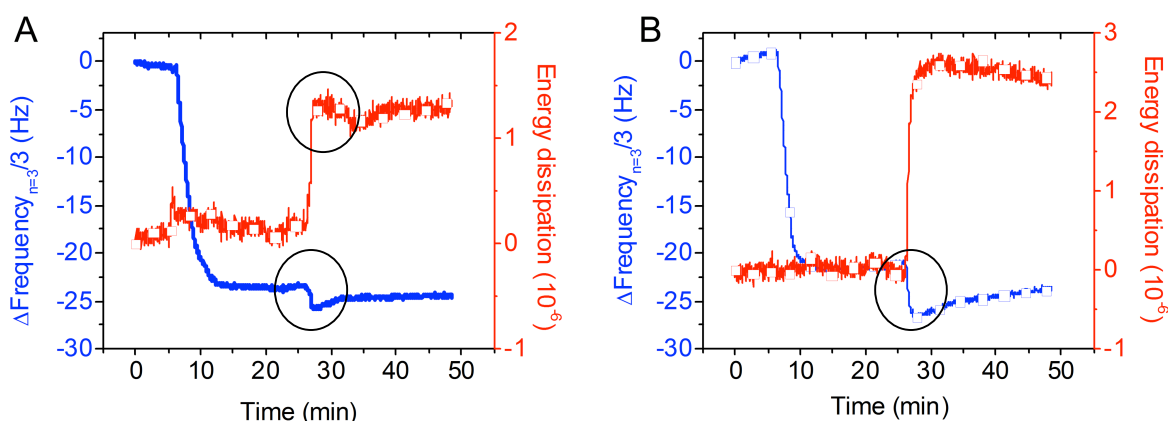

287  
 288  
 289  
 290  
 291  
 292  
 293  
 294  
 295  
 296  
 297

298 **Supporting Figure 6. Full length NS3 protein alone does not associate with lipid**  
299 **bilayer membranes. A)** Addition (arrow) of NS3-FL-BK (full length NS3 from HCV BK

300 strain) or **B)** addition (arrow) of NS3-FL-CON (from Con1 strain) protein to the

301 immobilized lipid bilayer does not result in significant frequency or dissipation changes,

302 indicating lack of binding.

303

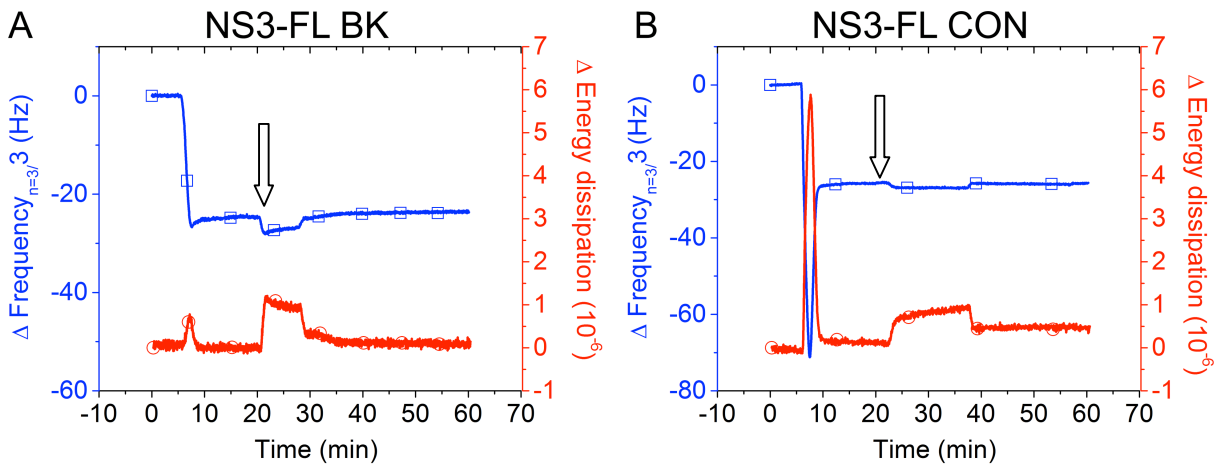

304

305

306

307

308

309

310

311

312

313

314

315

316

317

318

319 **Supporting Figure 7. Full Kinetic Traces for Step-by-Step Assembly and RNA-**  
320 **Dependent, RNA Polymerase (RdRp) Activity of the Membrane-Associated HCV**  
321 **Replicase Complex.** Individual replicase complex components were sequentially  
322 added to the sensing chamber and buffer exchanges performed as indicated by arrows  
323 in the Figure panels: **A)** SLB only, formation of an immobilized bilayer membrane; **B)**  
324 SLB + NS5B-FL, binding of NS5b protein to the membrane bilayer; **C)** RNA polymerase  
325 activity of NS5b; after formation of the NS5b containing bilayer membrane, a buffer  
326 exchange was performed into polymerase buffer (leading to a slight increase in  
327 frequency) and then cIRES RNA added, which bound to the immobilized NS5b, as  
328 indicated by the frequency decrease; when ribonucleoside triphosphates (rNTPs) were  
329 added, a slow, but continuous decrease in frequency was observed, consistent with  
330 continuous addition of nucleosides to the immobilized polymerase-cIRES RNA complex  
331 (polymerase activity) **D)** RNA polymerase activity of the NS5b-NS3 complex; NS3 was  
332 added to immobilized NS5b and binding observed by reduced frequency. Then cIRES  
333 RNA and NTPs were added. **E)** RNA polymerase activity in the presence of NS5a;  
334 NS5a was added to immobilized NS5b and binding observed by reduced frequency.  
335 Then cIRES RNA and NTPs were added. **F)** Binding of RNA prior to NS5a; in a  
336 changed sequence of complex formation, cIRES RNA was added to immobilized NS5b  
337 first. Then NS5a and NTPs were added. **G)** Polymerase reaction as (C), except that the  
338 chain-terminating inhibitor, 3'-dCTP, was added after 500min to stop the polymerase  
339 reaction. RdRp activity was calculated based on the total increase of mass associated  
340 with rNTP polymerization per bound NS5B per minute of polymerization, enabling  
341 determination of the apparent  $k_{cat}$  and total amounts of RNA synthesized. Main panels:  
342 representative QCM-D resonance frequency tracings; inset panels: magnified view of  
343 corresponding QCM-D tracing for polymerase kinetics upon rNTP addition.

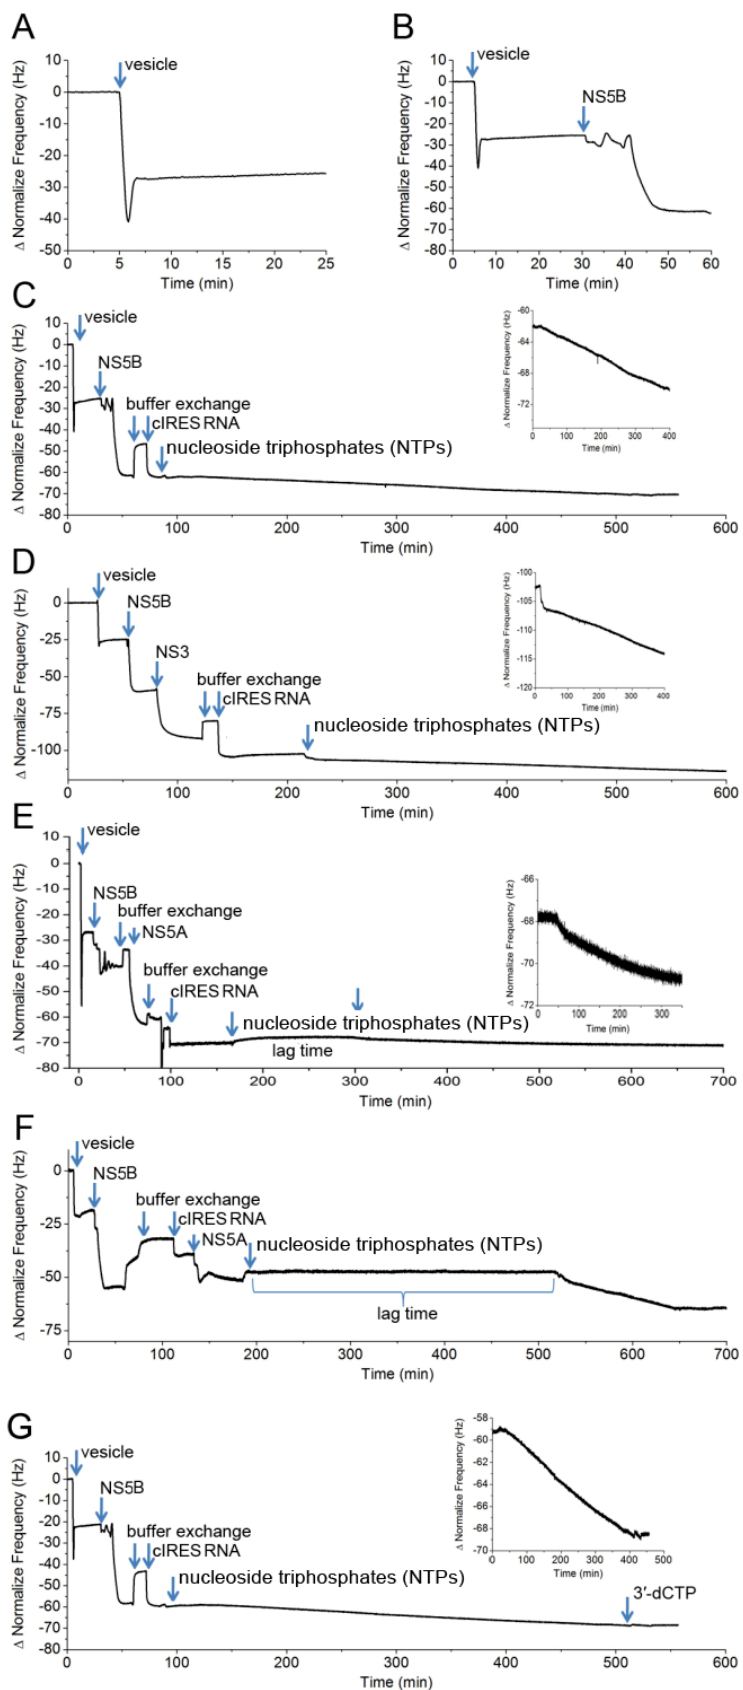



345 **Supporting Figure 8. No decline in resonance frequency is observed when fewer**  
346 **than all four native NTP species are added.** RNA-dependent, RNA polymerase  
347 (RdRp) activity of the membrane-associated HCV replicase complex was assayed as in  
348 Supporting Figure 7C, except that only the indicated two (A), or three (B) NTP species  
349 were added.

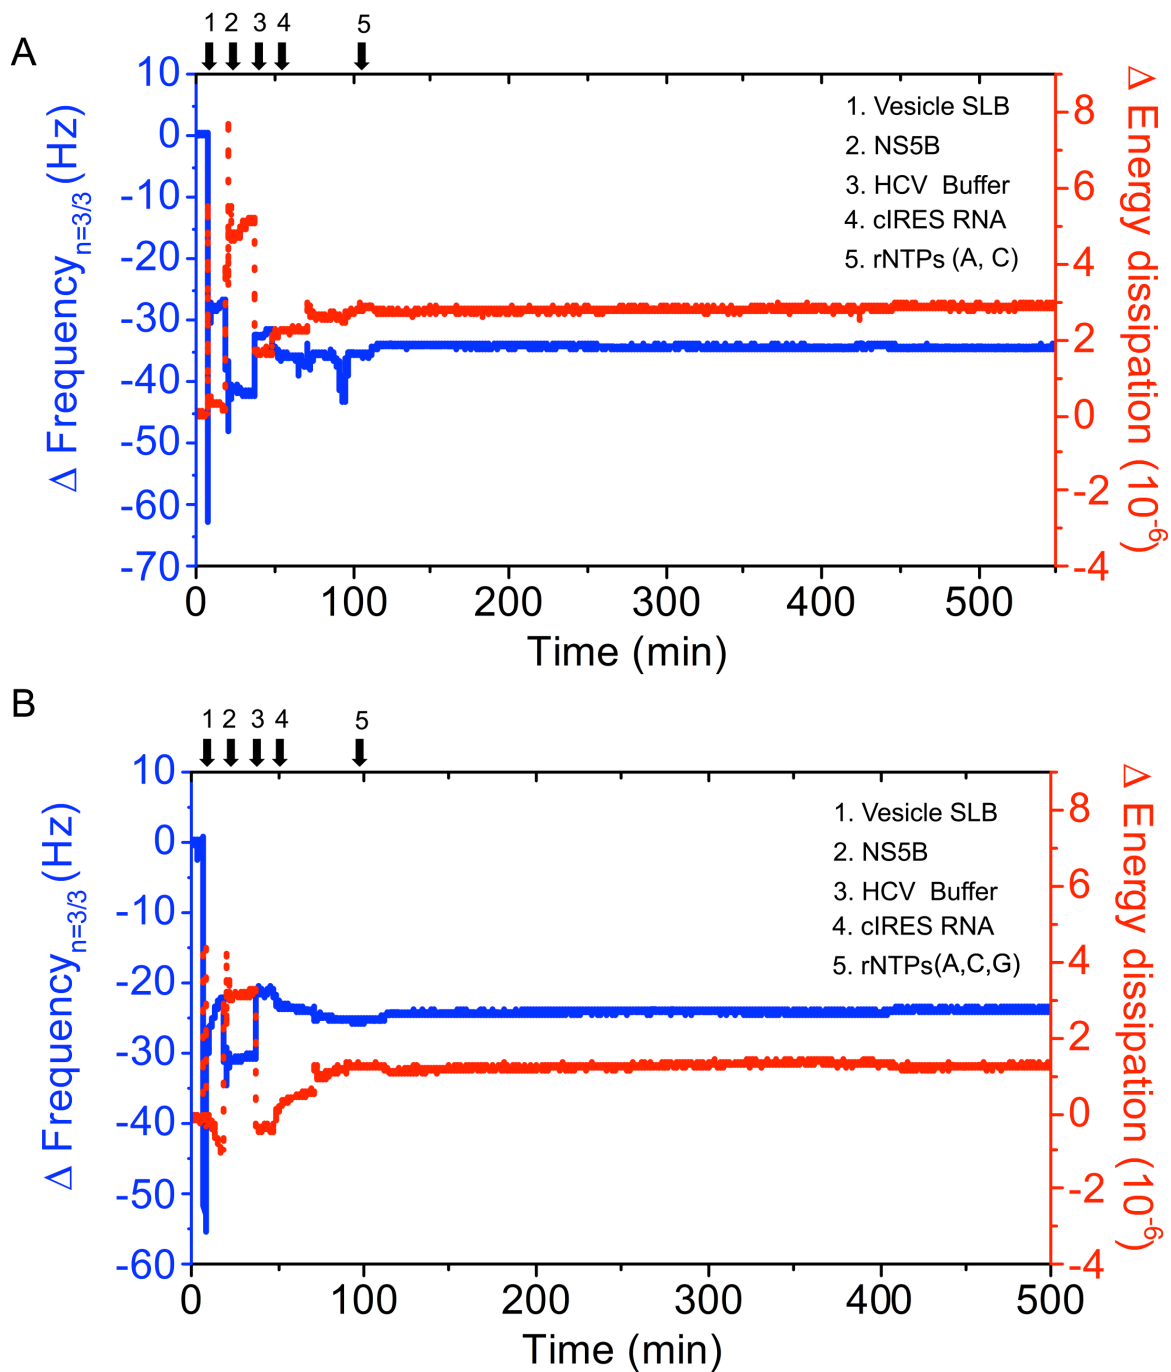

350

351 **Supporting Figure 9. NS5A $\Delta$ 32 Directly Binds to NS5B-FL.** **A)** NS5A-FL protein  
 352 binds to the SLB platform. **B)** NS5A $\Delta$ 32 protein does not bind to the SLB platform. **C)** In  
 353 the absence of cIRES RNA, NS5A $\Delta$ 32 can still bind to the SLB platform, but only via  
 354 binding to membrane-associated NS5B-FL.

355

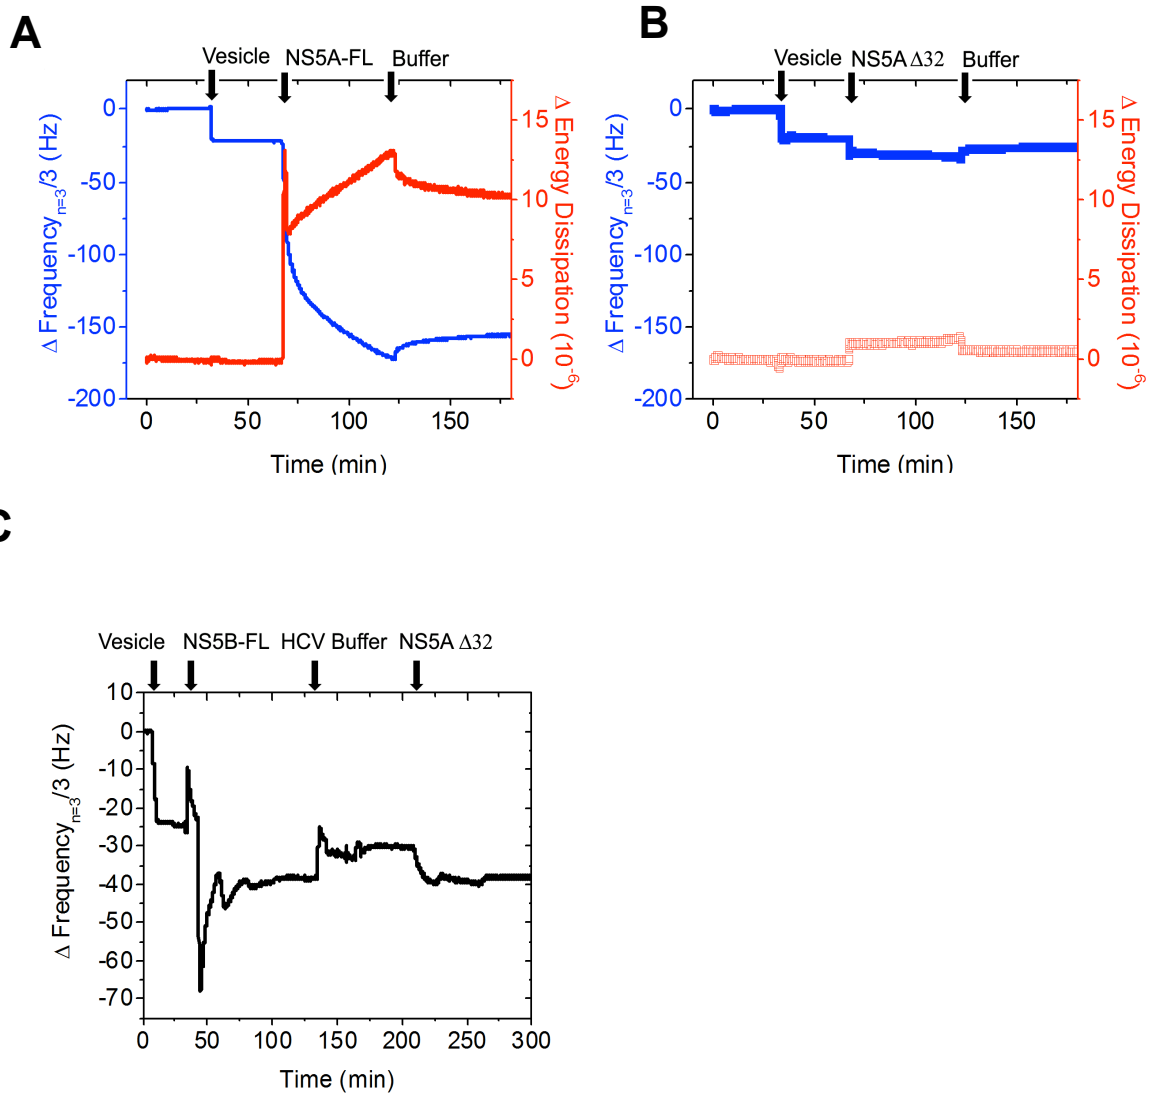

356

357

358

359

360 **Supporting Figure 10. Northern blot analysis of QCM products.** RNA synthesized  
361 from NS5B (NS5B-FL + cIRES RNA) or NS5B and NS5A (NS5B-FL + NS5A $\Delta$ 32 +  
362 cIRES RNA), as in Supporting Figure 7C and E, respectively, was extracted using Trizol  
363 at the end of the QCM experiments and analyzed via Northern blot. Template RNA  
364 alone was run on the same gel. Positive controls (PC) of 2 different lengths (247 and  
365 349 nts) corresponding to nucleotides 1 – 247 or 1 – 349 of the positive strand were  
366 included. Data are representative of 2 independently performed experiments.

367

368

369

370

371

372

373

374

375

376

377

378

379

380

381

382

383

384

385

386

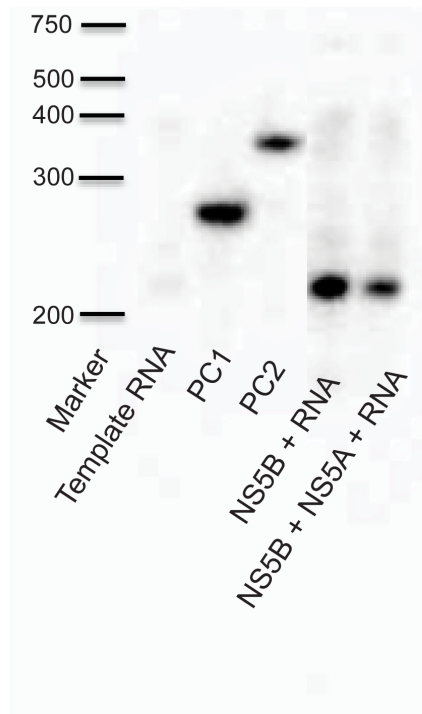

387 **Supporting Figure 11. Chemical structures of non-nucleoside HCV NS5B**  
388 **inhibitors HCV-796 and VX-222.**

389 HCV NS5B non-nucleoside inhibitor HCV-796:

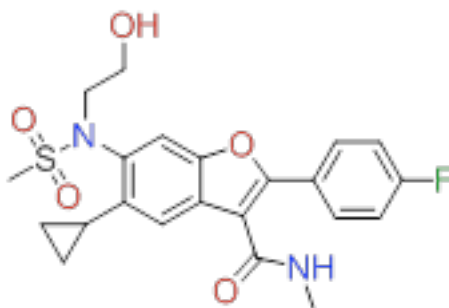

390

391 HCV NS5B non-nucleoside inhibitor VX-222:

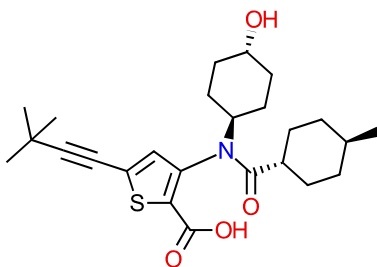

392

393

**Supporting Table 1. Summary of Kinetic Values.**

| <b>Protein</b>       | $V_{\max}^{(1)}$<br>pmol.min <sup>-1</sup> .cm <sup>-2</sup> | <b>[NS5B-FL]<sup>(1)</sup></b><br>pmol.cm <sup>-2</sup> | $V_{\max}^{(2)}$<br>pmol.min <sup>-1</sup> | <b>[NS5B]<sup>(2)</sup></b><br>pmol | $k_{\text{cat}}$<br>min <sup>-1</sup> | $k_{\text{cat}}$<br>Fold<br>shift |
|----------------------|--------------------------------------------------------------|---------------------------------------------------------|--------------------------------------------|-------------------------------------|---------------------------------------|-----------------------------------|
| NS5B-FL              | 1.3 ± 0.1                                                    | 9.9                                                     | N/A                                        | N/A                                 | 0.13 ± 0.10                           |                                   |
| NS5B-Δ21             | N/A                                                          | N/A                                                     | 0.10 ± 0.03                                | 1                                   | 0.10 ± 0.03                           | 0.8                               |
| NS5B-FL<br>+NS3-FL   | 1.1 ± 0.3                                                    | 9.3                                                     | N/A                                        | N/A                                 | 0.12 ± 0.03                           | 0.9                               |
| NS5B-FL<br>+NS5A-Δ32 | 5.7 ± 2.1                                                    | 6.7                                                     | N/A                                        | N/A                                 | 0.83 ± 0.33                           | 6.4                               |

394

395 (1) On the SLB platform

396 (2) In solution

397

398

399

400

401

402

403

404

405

406

407

408

409

410

411

412

413 **Supporting Table 2. QCM-D Measurement Data of Immobilized NS5B-FL Protein**  
 414 **and Enzyme Kinetics. A) NS5B-FL. B) NS5B-FL + NS3-FL. C) NS5B-FL + NS5A-Δ32.**

415

**A) NS5B-FL**

| Run  | Protein Immobilization |                                               |                                                 | Enzyme Kinetics |            |                                                               |                                                                 |                                       |
|------|------------------------|-----------------------------------------------|-------------------------------------------------|-----------------|------------|---------------------------------------------------------------|-----------------------------------------------------------------|---------------------------------------|
|      | NS5B-FL (Hz)           | NS5B-FL <sup>(1)</sup> (ng.cm <sup>-2</sup> ) | NS5B-FL <sup>(2)</sup> (pmol.cm <sup>-2</sup> ) | NTP (Hz)        | Time (min) | Vmax <sup>(1)</sup> (ng.cm <sup>-2</sup> .min <sup>-1</sup> ) | Vmax <sup>(3)</sup> (pmol.cm <sup>-2</sup> .min <sup>-1</sup> ) | k <sub>cat</sub> (min <sup>-1</sup> ) |
| 1    | 33.4                   | 591.2                                         | 9.0                                             | 9.7             | 360        | 0.48                                                          | 1.4                                                             | 0.16                                  |
| 2    | 41.3                   | 731.0                                         | 11.1                                            | 8.4             | 360        | 0.41                                                          | 1.2                                                             | 0.11                                  |
| 3    | 35.9                   | 636.0                                         | 9.7                                             | 8.7             | 360        | 0.43                                                          | 1.3                                                             | 0.13                                  |
| 4    | 36.0                   | 637.0                                         | 9.7                                             | 9.6             | 360        | 0.47                                                          | 1.4                                                             | 0.14                                  |
| Mean | 36.7                   | 648.8                                         | 9.9                                             | 9.1             |            | 0.45                                                          | 1.3                                                             | 0.13                                  |

420

**B) NS5B-FL + NS3-FL**

| Run  | Protein Immobilization |                                               |                                                 | Enzyme Kinetics |            |                                                               |                                                                 |                                       |
|------|------------------------|-----------------------------------------------|-------------------------------------------------|-----------------|------------|---------------------------------------------------------------|-----------------------------------------------------------------|---------------------------------------|
|      | NS5B-FL (Hz)           | NS5B-FL <sup>(1)</sup> (ng.cm <sup>-2</sup> ) | NS5B-FL <sup>(2)</sup> (pmol.cm <sup>-2</sup> ) | NTP (Hz)        | Time (min) | Vmax <sup>(1)</sup> (ng.cm <sup>-2</sup> .min <sup>-1</sup> ) | Vmax <sup>(3)</sup> (pmol.cm <sup>-2</sup> .min <sup>-1</sup> ) | k <sub>cat</sub> (min <sup>-1</sup> ) |
| 1    | 32.3                   | 571.5                                         | 8.7                                             | 5.9             | 360        | 0.29                                                          | 0.9                                                             | 0.10                                  |
| 2    | 36.6                   | 647.7                                         | 9.9                                             | 9.3             | 360        | 0.46                                                          | 1.3                                                             | 0.14                                  |
| Mean | 34.4                   | 609.6                                         | 9.3                                             | 7.6             |            | 0.37                                                          | 1.1                                                             | 0.12                                  |

424

**C) NS5B-FL + NS5A-Δ32**

| Run  | Protein Immobilization |                                               |                                                 | Enzyme Kinetics |            |                                                               |                                                                 |                                       |
|------|------------------------|-----------------------------------------------|-------------------------------------------------|-----------------|------------|---------------------------------------------------------------|-----------------------------------------------------------------|---------------------------------------|
|      | NS5B-FL (Hz)           | NS5B-FL <sup>(1)</sup> (ng.cm <sup>-2</sup> ) | NS5B-FL <sup>(2)</sup> (pmol.cm <sup>-2</sup> ) | NTP (Hz)        | time (min) | Vmax <sup>(1)</sup> (ng.cm <sup>-2</sup> .min <sup>-1</sup> ) | Vmax <sup>(3)</sup> (pmol.cm <sup>-2</sup> .min <sup>-1</sup> ) | k <sub>cat</sub> (min <sup>-1</sup> ) |
| 1    | 25.5                   | 451.4                                         | 6.9                                             | 18.8            | 140        | 2.38                                                          | 7.0                                                             | 1.02                                  |
| 2    | 22.9                   | 404.6                                         | 6.2                                             | 4.8             | 90         | 0.94                                                          | 2.8                                                             | 0.45                                  |
| 3    | 26.7                   | 471.7                                         | 7.2                                             | 19.4            | 139        | 2.47                                                          | 7.3                                                             | 1.01                                  |
| Mean | 25.0                   | 442.6                                         | 6.7                                             | 14.3            |            | 1.93                                                          | 5.7                                                             | 0.83                                  |

426

427

428

429

(1) Frequency-to-mass conversion factor: 17.7 Hz.ng<sup>-1</sup>.cm<sup>2</sup>

430

(2) MW<sup>NS5B-FL</sup> = 65782 g.mol<sup>-1</sup>

431

(3) MW<sup>NMP</sup> substrate = 340 g.mol<sup>-1</sup>

432

433

434

435

436

437

438 **References**

- 439 1. Lesburg, C. A.; Cable, M. B.; Ferrari, E.; Hong, Z.; Mannarino, A. F.; Weber, P. C.,  
440 Crystal structure of the RNA-dependent RNA polymerase from hepatitis C virus reveals  
441 a fully encircled active site. *Nat. Struct. Mol. Biol.* **1999**, *6*, 937-943.
- 442 2. Cho, N. J.; Frank, C. W.; Kasemo, B.; Hook, F., Quartz crystal microbalance with  
443 dissipation monitoring of supported lipid bilayers on various substrates. *Nat. Protoc.*  
444 **2010**, *5*, 1096-1106.
- 445 3. Cho, N. J.; Frank, C. W., Fabrication of a planar zwitterionic lipid bilayer on titanium  
446 oxide. *Langmuir* **2010**, *26*, 15706-15710.
- 447 4. Cho, N. J.; Jackman, J. A.; Liu, M.; Frank, C. W., pH-driven assembly of various  
448 supported lipid platforms: A comparative study on silicon oxide and titanium oxide.  
449 *Langmuir* **2011**, *27*, 3739-3748.
- 450 5. Jackman, J. A.; Cho, N. J.; Duran, R. S.; Frank, C. W., Interfacial binding dynamics of  
451 bee venom phospholipase A<sub>2</sub> investigated by dynamic light scattering and quartz crystal  
452 microbalance. *Langmuir* **2010**, *26*, 4103-4112.
- 453 6. Reimhult, E.; Höök, F.; Kasemo, B., Vesicle adsorption on SiO<sub>2</sub> and TiO<sub>2</sub>:  
454 Dependence on vesicle size. *J. Chem. Phys.* **2002**, *117*, 7401-7404.
- 455 7. Reimhult, E.; Höök, F.; Kasemo, B., Intact vesicle adsorption and supported  
456 biomembrane formation from vesicles in solution: Influence of surface chemistry,  
457 vesicle size, temperature, and osmotic pressure. *Langmuir* **2003**, *19*, 1681-1691.
- 458 8. McCubbin, G. A.; Praporski, S.; Piantavigna, S.; Knappe, D.; Hoffmann, R.; Bowie, J.  
459 H.; Separovic, F.; Martin, L. L., QCM-D fingerprinting of membrane-active peptides. *Eur*  
460 *Biophys. J.* **2011**, *40*, 437-446.

461

462
